# Supplementary material for: Benzodiazepine-Related Cognitive Impairment or Dementia: A Signal Detection Study Using a Case/Non-Case Approach
Source: PubMed Central journal article supplement — Psychiatry Investig. 2020 May 27;17(6):587–95. doi: 10.30773/pi.2019.0275 (PMC7324737; doi:10.30773/pi.2019.0275), 2020-05-27
Supplement: pi-2019-0275-suppl.pdf [file pi-2019-0275-suppl.pdf]

**Supplementary Table 1.** Case definitions using World Health Organization adverse reactions terminology

| Categories        | ARRN | Preferred terms                                                                                                                                                                                                                                                                                                                    |
|-------------------|------|------------------------------------------------------------------------------------------------------------------------------------------------------------------------------------------------------------------------------------------------------------------------------------------------------------------------------------|
| Cognitive decline | 0199 | Thinking abnormal, bradyphrenia, cerebration impaired, mental concentration difficulty, intellect impaired, mental torpor, judgment impaired, mental dullness, thinking irrational, thought block, bradypsychic responses, mental state abnormal, mental state abnormal aggravated, dyslogia, perception disturbance, tachyphrenia |
|                   | 1877 | Cognitive disorders, cognitive function abnormal, cognitive deterioration, acalculia, amusia                                                                                                                                                                                                                                       |
| Dementia          | 0100 | Dementia, dementia acquired, mental deterioration, dementia aggravation, Pick's disease, senile dementia, Korsakoff's psychosis                                                                                                                                                                                                    |
|                   | 1453 | Alzheimer's disease                                                                                                                                                                                                                                                                                                                |

ARRN: Adverse Reaction Record Number
